# Supplementary material for: Molecular Epidemiology of Pasteurella multocida Associated with Bovine Respiratory Disease Outbreaks
Source: MDPI journal article supplement (doi:10.3390/ani13010075), 2022-12-24
Supplement: s1 [file s1]

Table S1. Details of the 125 BRD outbreaks and the 170 *P. multocida* isolates analyzed.

| Outbreak | Province    | Farm       | Date       | No. of isolates | Cap:LPS:VT | ST*<br>RIRDC |
|----------|-------------|------------|------------|-----------------|------------|--------------|
| 1        | A Coruña    | Granja 2   | 03/01/2020 | 1               | A:L3:VT1   | ST79         |
| 2        | Ávila       | Granja 86  | 26/11/2020 | 1               | A:L3:VT2   |              |
| 3        | Ávila       | Granja 86  | 17/06/2021 | 1               | A:L3:VT2   |              |
| 4        | Ávila       | Granja 205 | 25/10/2021 | 4               | A:L3:VT1   | ST13         |
| 5        | Ávila       | Granja 214 | 17/11/2021 | 1               | A:L3:VT2   | ST79         |
| 6        | Barcelona   | Granja 201 | 06/10/2021 | 1               | A:L3:VT1   | ST13         |
| 7        | Barcelona   | Granja 220 | 17/12/2021 | 1               | A:L3:VT1   |              |
| 8        | Burgos      | Granja 67  | 01/09/2020 | 1               | B:L2:VT5   | ST322        |
| 9        | Burgos      | Granja 152 | 22/04/2021 | 1               | A:L3:VT1   | ST13         |
| 10       | Burgos      | Granja 225 | 04/01/2022 | 1               | A:L3:VT1   |              |
| 11       | Cáceres     | Granja 88  | 27/11/2020 | 1               | A:L3:VT1   | ST13         |
| 12       | Cáceres     | Granja 89  | 27/11/2020 | 4               | A:L3:VT1   |              |
| 13       | Cáceres     | Granja 187 | 24/08/2021 | 1               | A:L3:VT2   | ST79         |
| 14       | Castellon   | Granja 227 | 11/01/2022 | 1               | A:L3:VT1   | ST13         |
| 15       | Gipuzkoa    | Granja 173 | 23/06/2021 | 1               | A:L3:VT1   | ST79         |
| 16       | Girona      | Granja 34  | 12/05/2020 | 1               | A:L3:VT1   | ST13         |
| 17       | Girona      | Granja 47  | 05/06/2020 | 1               | A:L3:VT1   |              |
| 18       | Girona      | Granja 55  | 24/07/2020 | 1               | A:L3:VT1   | ST79         |
| 19       | Girona      | Granja 80  | 17/11/2020 | 1               | A:L3:VT1   |              |
| 20       | Girona      | Granja 34  | 28/01/2021 | 1               | A:L3:VT1   |              |
| 21       | Girona      | Granja 212 | 10/11/2021 | 1               | A:L3:VT7   | ST13         |
| 22       | Guadalajara | Granja 1   | 03/01/2020 | 1               | A:L3:VT1   | ST79         |
| 23       | Guadalajara | Granja 222 | 22/12/2021 | 1               | A:L3:VT1   |              |
| 24       | Huesca      | Granja 33  | 08/05/2020 | 1               | A:L3:VT1   |              |
| 25       | Huesca      | Granja 66  | 28/08/2020 | 1               | A:L3:VT1   |              |
| 26       | Huesca      | Granja 113 | 10/02/2021 | 1               | A:L3:VT2   | ST79         |
| 27       | Huesca      | Granja 114 | 10/02/2021 | 1               | A:L3:VT2   |              |
| 28       | Huesca      | Granja 144 | 06/04/2021 | 1               | A:L3:VT1   |              |
| 29       | Huesca      | Granja 160 | 20/05/2021 | 1               | A:L3:VT1   | ST13         |
| 30       | Huesca      | Granja 193 | 13/09/2021 | 4               | A:L3:VT1   |              |
| 31       | Huesca      | Granja 229 | 19/01/2022 | 1               | A:L3:VT1   |              |
| 32       | Huesca      | Granja 230 | 01/02/2022 | 1               | A:L3:VT1   |              |
| 33       | La Rioja    | Granja 30  | 30/04/2020 | 4               | A:L3:VT1   | ST79         |
|          |             |            |            |                 | A:L3:VT2   | ST79         |
|          |             |            |            |                 | A:L3:VT4   | ST79         |
| 34       | La Rioja    | Granja 8   | 30/04/2020 | 1               | A:L3:VT1   | ST79         |
| 35       | La Rioja    | Granja 30  | 19/05/2020 | 1               | A:L3:VT4   |              |
| 36       | La Rioja    | Granja 195 | 28/09/2021 | 1               | A:L3:VT1   |              |

|    |            |            |            |   |              |      |
|----|------------|------------|------------|---|--------------|------|
| 37 | Las Palmas | Granja 45  | 04/06/2020 | 1 | A:L3:VT1     | ST13 |
| 38 | Las Palmas | Granja 181 | 10/08/2021 | 1 | A:L3:VT1     | ST79 |
| 39 | Las Palmas | Granja 181 | 18/08/2021 | 4 | A:L3:VT1     |      |
| 40 | Las Palmas | Granja 224 | 30/12/2021 | 1 | A:L3:VT2     | ST79 |
| 41 | León       | Granja 21  | 03/03/2020 | 1 | A:L3:VT1     | ST79 |
| 42 | León       | Granja 153 | 29/04/2021 | 1 | A:L3:VT1     |      |
| 43 | Lleida     | Granja 46  | 04/06/2020 | 1 | A:L3:VT1     |      |
| 44 | Lleida     | Granja 96  | 22/12/2020 | 4 | A:L3:VT1 (4) | ST79 |
| 45 | Lleida     | Granja 99  | 31/12/2020 | 1 | A:L3:VT1     |      |
| 46 | Lleida     | Granja 216 | 02/12/2021 | 1 | A:L3:VT2     | ST79 |
| 47 | Lleida     | Granja 217 | 03/12/2021 | 1 | A:L3:VT2     |      |
| 48 | Lleida     | Granja 228 | 14/01/2022 | 1 | A:L3:VT2     |      |
| 49 | Lleida     | Granja 231 | 01/02/2022 | 1 | A:L3:VT1     |      |
| 50 | Lugo       | Granja 23  | 04/03/2020 | 1 | A:L3:VT1     | ST79 |
| 51 | Murcia     | Granja 98  | 22/12/2020 | 4 | A:L3:VT1     | ST79 |
| 52 | Murcia     | Granja 119 | 18/02/2021 | 1 | A:L3:VT1     |      |
| 53 | Murcia     | Granja 161 | 25/05/2021 | 4 | A:L3:VT1     |      |
| 54 | Murcia     | Granja 219 | 16/12/2021 | 1 | A:L3:VT1     |      |
| 55 | Murcia     | Granja 221 | 17/12/2021 | 1 | A:L3:VT1     |      |
| 56 | Navarra    | Granja 6   | 15/01/2020 | 1 | A:L3:VT1     |      |
| 57 | Navarra    | Granja 9   | 22/01/2020 | 1 | A:L3:VT1     |      |
| 58 | Navarra    | Granja 10  | 24/01/2020 | 1 | A:L3:VT1     |      |
| 59 | Navarra    | Granja 6   | 25/11/2020 | 1 | A:L3:VT1     |      |
| 60 | Navarra    | Granja 94  | 17/12/2020 | 1 | A:L3:VT1     |      |
| 61 | Navarra    | Granja 94  | 19/01/2021 | 1 | A:L3:VT1     |      |
| 62 | Navarra    | Granja 127 | 03/03/2021 | 1 | A:L3:VT1     | ST79 |
| 63 | Navarra    | Granja 164 | 04/06/2021 | 2 | A:L3:VT1     |      |
| 64 | Navarra    | Granja 167 | 10/06/2021 | 1 | A:L3:VT2     | ST79 |
| 65 | Navarra    | Granja 172 | 23/06/2021 | 1 | A:L3:VT1     |      |
| 66 | Navarra    | Granja 174 | 23/06/2021 | 3 | A:L3:VT1     |      |
| 67 | Navarra    | Granja 94  | 04/08/2021 | 1 | A:L3:VT1     |      |
| 68 | Navarra    | Granja 180 | 06/08/2021 | 1 | A:L3:VT1     |      |
| 69 | Navarra    | Granja 94  | 27/08/2021 | 1 | A:L3:VT1     |      |
| 70 | Navarra    | Granja 213 | 10/11/2021 | 1 | A:L3:VT1     |      |
| 71 | Navarra    | Granja 232 | 02/02/2022 | 1 | A:L3:VT1     |      |
| 72 | Palencia   | Granja 191 | 09/09/2021 | 1 | A:L3:VT1     | ST79 |
| 73 | Salamanca  | Granja 19  | 27/02/2020 | 1 | A:L3:VT2     | ST79 |
| 74 | Salamanca  | Granja 57  | 10/08/2020 | 1 | A:L3:VT1     | ST79 |
| 75 | Salamanca  | Granja 81  | 17/11/2020 | 1 | F:L3:VT6     | ST9  |
| 76 | Salamanca  | Granja 87  | 26/11/2020 | 1 | A:L3:VT2     |      |
| 77 | Salamanca  | Granja 163 | 27/05/2021 | 1 | A:L3:VT1     |      |
| 78 | Salamanca  | Granja 19  | 17/06/2021 | 1 | A:L3:VT2     |      |
| 79 | Segovia    | Granja 20  | 27/02/2020 | 1 | A:L3:VT1     | ST13 |
| 80 | Segovia    | Granja 27  | 13/03/2020 | 1 | A:L3:VT1     |      |

|     |            |            |            |   |                               |              |
|-----|------------|------------|------------|---|-------------------------------|--------------|
| 81  | Segovia    | Granja 95  | 18/12/2020 | 1 | A:L3:VT1                      |              |
| 82  | Segovia    | Granja 203 | 15/10/2021 | 1 | A:L6:VT3                      | ST206        |
| 83  | Segovia    | Granja 218 | 16/12/2021 | 1 | A:L3:VT1                      |              |
| 84  | Soria      | Granja 18  | 25/02/2020 | 1 | A:L3:VT1                      | ST13         |
| 85  | Soria      | Granja 166 | 09/06/2021 | 4 | A:L3:VT1                      |              |
| 86  | Soria      | Granja 215 | 24/11/2021 | 1 | A:L3:VT1                      |              |
| 87  | Teruel     | Granja 154 | 29/04/2021 | 4 | A:L3:VT1 (3);<br>A:L3:VT2 (1) | ST13<br>ST79 |
| 88  | Teruel     | Granja 226 | 07/01/2022 | 1 | A:L3:VT1                      |              |
| 89  | Toledo     | Granja 38  | 20/05/2020 | 4 | A:L3:VT1                      | ST79         |
| 90  | Toledo     | Granja 41  | 20/05/2020 | 1 | A:L6:VT3                      | ST206        |
| 91  | Toledo     | Granja 40  | 20/05/2020 | 4 | A:L3:VT1                      |              |
| 92  | Toledo     | Granja 82  | 24/11/2020 | 1 | A:L3:VT2                      | ST79         |
| 93  | Toledo     | Granja 91  | 04/12/2020 | 1 | A:L3:VT1                      |              |
| 94  | Toledo     | Granja 92  | 04/12/2020 | 1 | A:L3:VT1                      |              |
| 95  | Toledo     | Granja 116 | 16/02/2021 | 4 | A:L3:VT1                      |              |
| 96  | Toledo     | Granja 82  | 04/03/2021 | 1 | A:L3:VT1                      |              |
| 97  | Toledo     | Granja 82  | 12/08/2021 | 1 | A:L3:VT2                      |              |
| 98  | Toledo     | Granja 223 | 29/12/2021 | 1 | A:L3:VT1                      |              |
| 99  | Toledo     | Granja 233 | 03/02/2022 | 1 | A:L3:VT2                      |              |
| 100 | Valencia   | Granja 190 | 31/08/2021 | 1 | A:L3:VT1                      |              |
| 101 | Valencia   | Granja 200 | 05/10/2021 | 1 | A:L3:VT1                      | ST79         |
| 102 | Valencia   | Granja 211 | 05/11/2021 | 1 | A:L3:VT2                      | ST79         |
| 103 | Valladolid | Granja 22  | 04/03/2020 | 1 | A:L3:VT1                      |              |
| 104 | Valladolid | Granja 14  | 02/12/2020 | 1 | A:L3:VT1                      | ST13         |
| 105 | Valladolid | Granja 14  | 11/03/2021 | 1 | A:L3:VT1                      |              |
| 106 | Valladolid | Granja 147 | 08/04/2021 | 1 | A:L3:VT1                      |              |
| 107 | Valladolid | Granja 93  | 21/04/2021 | 1 | A:L3:VT1                      |              |
| 108 | Valladolid | Granja 147 | 14/05/2021 | 1 | A:L3:VT1                      |              |
| 109 | Valladolid | Granja 171 | 17/06/2021 | 1 | A:L3:VT1                      |              |
| 110 | Zamora     | Granja 5   | 10/01/2020 | 1 | A:L3:VT1                      |              |
| 111 | Zamora     | Granja 5   | 29/01/2020 | 1 | A:L3:VT1                      |              |
| 112 | Zamora     | Granja 43  | 22/05/2020 | 4 | A:L3:VT1                      | ST79         |
| 113 | Zamora     | Granja 49  | 12/06/2020 | 1 | A:L3:VT1                      |              |
| 114 | Zamora     | Granja 50  | 17/06/2020 | 1 | A:L3:VT2                      | ST79         |
| 115 | Zamora     | Granja 101 | 18/01/2021 | 1 | A:L3:VT1                      |              |
| 116 | Zamora     | Granja 132 | 11/03/2021 | 1 | A:L3:VT1                      |              |
| 117 | Zamora     | Granja 142 | 26/03/2021 | 1 | A:L3:VT1                      |              |
| 118 | Zamora     | Granja 5   | 20/05/2021 | 1 | A:L3:VT1                      |              |
| 119 | Zamora     | Granja 176 | 08/07/2021 | 1 | A:L3:VT2                      |              |
| 120 | Zamora     | Granja 234 | 04/02/2022 | 1 | A:L3:VT1                      |              |
| 121 | Zaragoza   | Granja 11  | 28/01/2020 | 1 | A:L3:VT1                      |              |
| 122 | Zaragoza   | Granja 65  | 27/08/2020 | 1 | A:L3:VT1                      | ST13         |
| 123 | Zaragoza   | Granja 65  | 10/11/2020 | 1 | A:L3:VT1                      |              |

|            |          |            |            |   |          |
|------------|----------|------------|------------|---|----------|
| <b>124</b> | Zaragoza | Granja 149 | 14/04/2021 | 1 | A:L3:VT1 |
| <b>125</b> | Zaragoza | Granja 150 | 16/04/2021 | 1 | A:L3:VT1 |

\*One isolate representative of the different genotypes (capsular-LPS and virulotypes) identified in each province was analyzed
